# Supplementary material for: A 2D/1D heterojunction nanocomposite built from polymeric carbon nitride and MIL-88A(Fe) derived α-Fe2O3for enhanced photocatalytic degradation of rhodamine B
Source: Royal Society of Chemistry journal article supplement (doi:10.1039/d1nj05439b), 2022-01-01
Supplement: d1nj05439b1.pdf [file d1nj05439b1.pdf]

## SUPPLEMENTARY INFORMATION

### A 2D/1D Heterojunction Nanocomposite built from Polymeric Carbon Nitride and MIL-88A(Fe) derived $\alpha$ -Fe<sub>2</sub>O<sub>3</sub> for Enhanced Photocatalytic degradation of Rhodamine-B

Vandana P. Viswanathan,<sup>†</sup> Nayarassery N. Adarsh,<sup>†</sup> Marylin Mary Xavier,<sup>†</sup> and Suresh Mathew<sup>\*,†,‡</sup>

<sup>†</sup>School of Chemical Sciences, Mahatma Gandhi University, Kottayam, 686560, Kerala, India.

<sup>‡</sup>Advanced Molecular Materials Research Centre (AMMRC), Mahatma Gandhi University, Kottayam, 686560, Kerala, India.

| Sl. No. | Fe <sub>2</sub> O <sub>3</sub> Precursor                                         | Synthesis    | Photocatalytic condition                                           | Degradation efficiency                        | Reference No.    |
|---------|----------------------------------------------------------------------------------|--------------|--------------------------------------------------------------------|-----------------------------------------------|------------------|
| 1.      | MIL-53(Fe)                                                                       | Hydrothermal | 50 mg, 100W LED lamp (420 nm)                                      | 92% of TC for 60 m.                           | 52               |
| 2       | MIL-101                                                                          | Hydrothermal | 300W Xe lamp                                                       | Hydrogen evolution                            | 53               |
| 3       | MIL-100                                                                          | Hydrothermal | 300W Xe lamp                                                       | Hydrogen evolution                            | 54               |
| 4       | Waste iron rust                                                                  | Calcination  | 100 mg, Sunlight                                                   | 99% MO for 120 m                              | 44               |
| 5       | FeCl <sub>3</sub> ·6H <sub>2</sub> O                                             | Hydrothermal | 100 mg, 300W Xe lamp                                               | 98% Cr(VI) reduction for 150 m                | 40               |
| 6       | Fe(NO <sub>3</sub> ) <sub>3</sub> ·9H <sub>2</sub> O                             | Calcination  | 50 mg, 300W Xe lamp                                                | 90% Hg reduction for 60 m                     | 37               |
| 7       | Fe <sub>2</sub> (C <sub>2</sub> O <sub>4</sub> ) <sub>3</sub> ·6H <sub>2</sub> O | Calcination  | 10 mg,                                                             | Removal of Phospate                           | 38               |
| 8       | FeCl <sub>3</sub> ·6H <sub>2</sub> O                                             | Calcination  | 100 mg                                                             | CO <sub>2</sub> reduction                     | 39               |
| 9       | FeCl <sub>3</sub> ·6H <sub>2</sub> O                                             | Calcination  | 20mg, 300W Xe lamp                                                 | Hydrogen evolution                            | 34               |
| 10      | Fe(NO <sub>3</sub> ) <sub>3</sub>                                                | Calcination  | 65 W CFL lamp, intensity-125 W/m <sup>2</sup> , $\lambda > 400$ nm | 94.7% RhB reduction for 140 m                 | 35               |
| 11      | Fe(NO <sub>3</sub> ) <sub>3</sub> ·9H <sub>2</sub> O                             | Hydrothermal | 70mg, 300W Xe lamp                                                 | 96.7% RhB reduction for 4 h                   | 42               |
| 12      | FeCl <sub>3</sub>                                                                | Hydrothermal | 300W Xe lamp                                                       | Completely degraded 4-nitrophenol 100% for 6h | 43               |
| 13      | MIL-88A(Fe)                                                                      | Calcination  | Sunlight                                                           | 92% of RhB for 60 minutes                     | <b>This Work</b> |

**Table S1. Comparison of the photocatalytic degradation efficiency of MIL-88A derived Fe<sub>2</sub>O<sub>3</sub> /C<sub>3</sub>N<sub>4</sub> with literature**

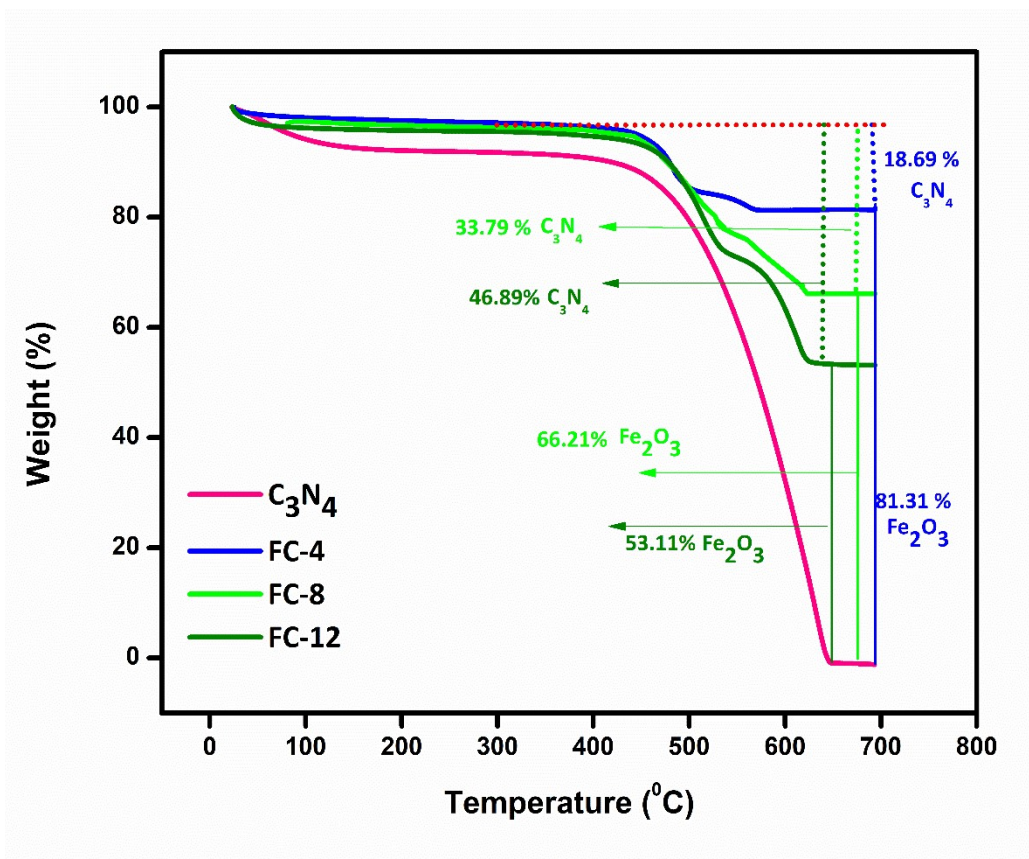

Figure S1. Thermogravimetry curve of  $C_3N_4$ , FC-4, FC-8 and FC-12

| Sample Name              | % of $C_3N_4$ evolved | % of $C_3N_4$ left in the residue | % of Residue ( $Fe_2O_3/C_3N_4$ )      | Reference                      |
|--------------------------|-----------------------|-----------------------------------|----------------------------------------|--------------------------------|
| MIL-88A                  | 0%                    | -                                 | 45%<br>Corresponding to only $Fe_2O_3$ | RSC Adv., 2015, 5, 32520–32530 |
| $C_3N_4$                 | 100%                  | -                                 | 0 %                                    | This work                      |
| $Fe_2O_3/C_3N_4$ (FC-4)  | 18.69%                | 36.31%                            | 81.31%                                 | This work                      |
| $Fe_2O_3/C_3N_4$ (FC-8)  | 33.79%                | 21.21%                            | 66.21%                                 | This work                      |
| $Fe_2O_3/C_3N_4$ (FC-12) | 46.89%                | 8.11%                             | 53.11%                                 | This work                      |

Table S2. Tabulated data of weight % of  $C_3N_4$  evolved and % of  $C_3N_4$  left in the residue by the decomposition of FC-4, FC-8 and FC-12

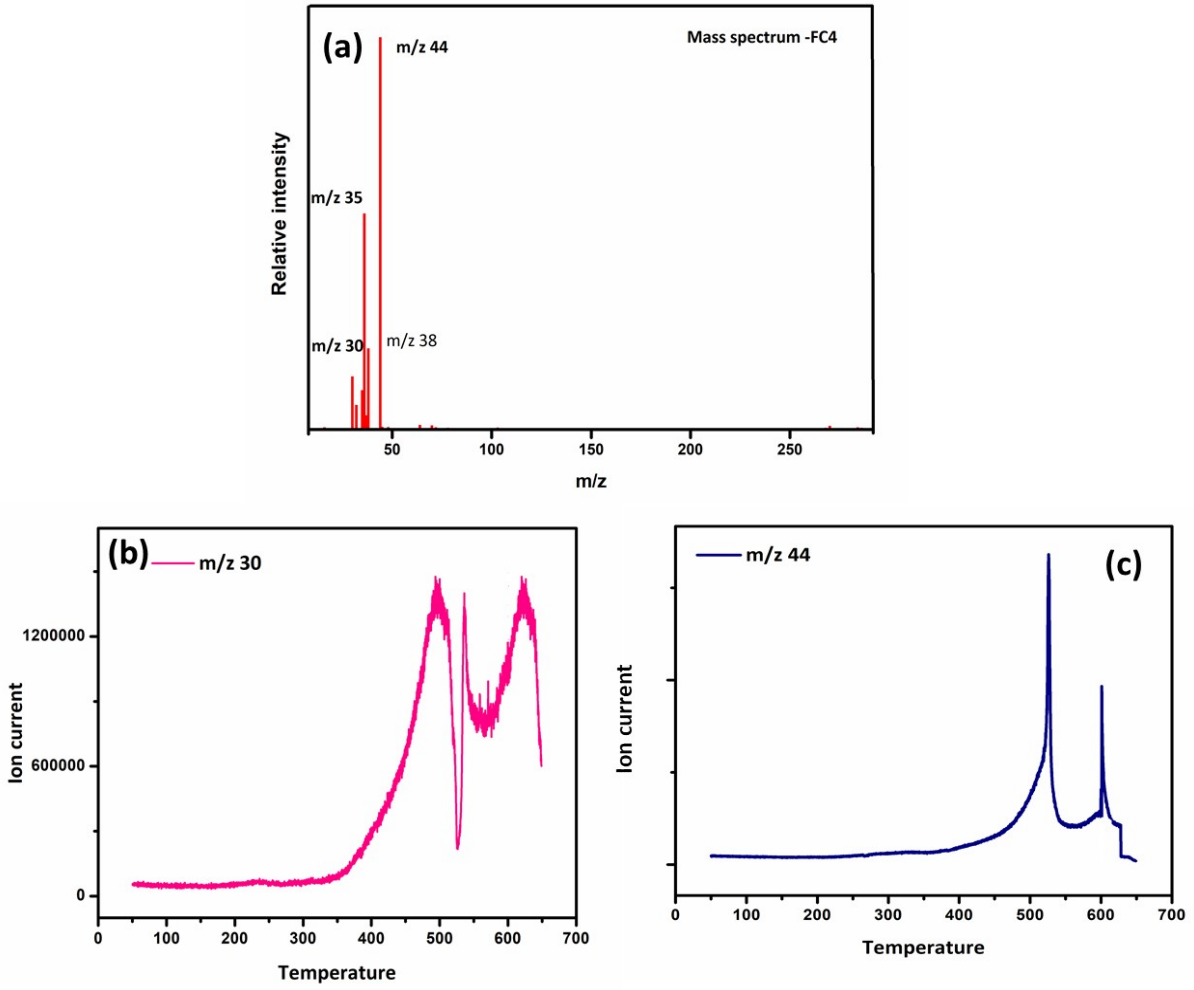

Figure S2. a) Mass spectrum of FC-4 b) Gas chromatogram (m/z=30) c) Gas chromatogram (m/z=44)

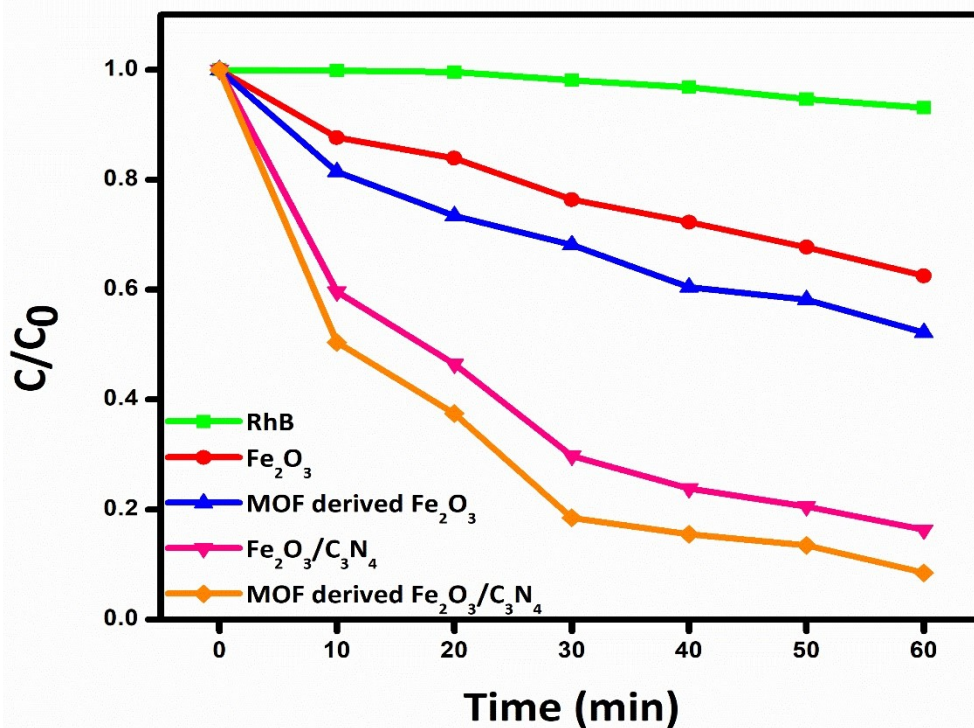

Figure S3. Photocatalytic degradation curves of RhB using  $\alpha$ -Fe<sub>2</sub>O<sub>3</sub>/C<sub>3</sub>N<sub>4</sub> and MOF-derived  $\alpha$ -Fe<sub>2</sub>O<sub>3</sub>/C<sub>3</sub>N<sub>4</sub>

| Parameters                                    | Fe <sub>2</sub> O <sub>3</sub> | g-C <sub>3</sub> N <sub>4</sub> |
|-----------------------------------------------|--------------------------------|---------------------------------|
| Bandgap E <sub>g</sub> (eV)                   | 2.0                            | 2.97                            |
| Absolute electronegativity $\chi$ (eV)        | 5.82                           | 4.72                            |
| Free electrons energy E <sup>c</sup> (eV)     | 4.50                           | 4.50                            |
| Valence band position (E <sub>VB</sub> ) (eV) | +2.32                          | +1.705                          |
| Conduction band position E <sub>CB</sub> (eV) | +0.32                          | -1.265                          |

Table S3. Bandgap, Conduction and Valence band values of  $\alpha$ -Fe<sub>2</sub>O<sub>3</sub> and C<sub>3</sub>N<sub>4</sub>
